# Supplementary material
Source: publisher figshare collection journal article supplement (https://acs.figshare.com/ndownloader/files/4315762)
Supplement: Supplementary file 1 [file 4315762]

# Improving Protein Transfer Efficiency and Selectivity in Affinity Contact Printing by Using UV-Modified Surfaces

*Chih-Hsin Chen and Kun-Lin Yang\**

Department of Chemical and Biomolecular Engineering, National University of Singapore, 4  
Engineering Drive 4, Singapore 117576, Singapore

\* To whom correspondence should be addressed.

Phone: +65-6516-6614

Email: [cheyk@nus.edu.sg](mailto:cheyk@nus.edu.sg)

## Experimental Section

**X-ray Photoelectron Spectroscopy (XPS).** The chemical composition of the surface was determined by using XPS in an AXIS-His spectrometer (Kratos Analytical, Japan) with a monochromatized Al K $\alpha$  X-ray source (1486.6 eV) and a pass energy of 40 eV. The X-ray source was operated at 150 W, and the pressure in the chamber was kept at 10<sup>-8</sup> Torr during the analysis. The samples were loaded on standard studs by using double-sided adhesive tape. The C (1s) hydrocarbon peak at 285.0 eV was used as the reference peak for all binding energy measurements.

## Results and Discussion

**Surface Characterization of UV-modified Surfaces by XPS.** To further verify the formation of aldehyde groups on the UV-modified surfaces, we performed an additional characterization on the UV-modified PDMS and DMOAP surface by using XPS. As shown in Figure S1a and S1b, there is an additional C (1s) shoulder peak ( $\sim 288.0$  eV) in the XPS spectrum after UV-modification on the PDMS stamp. It can be attributed to the formation of aldehyde ( $\text{C}=\text{O}$ ) groups on the PDMS surface. However, since the composition of C-C and C-H bond in PDMS stamp is predominant, the shoulder peak caused by the aldehyde groups is not obvious. Therefore, we feel that the XPS result does not provide a conclusive evidence to demonstrate the formation of aldehyde on the surface. On the other hand, the C (1s) XPS spectra of UV-modified DMOAP surface in Figure S2a also shows an additional shoulder peak ( $\sim 288.0$  eV) which can be attributed to aldehyde groups. However, this peak overlaps with the C-N peak ( $\sim 286.0$  eV) of DMOAP.

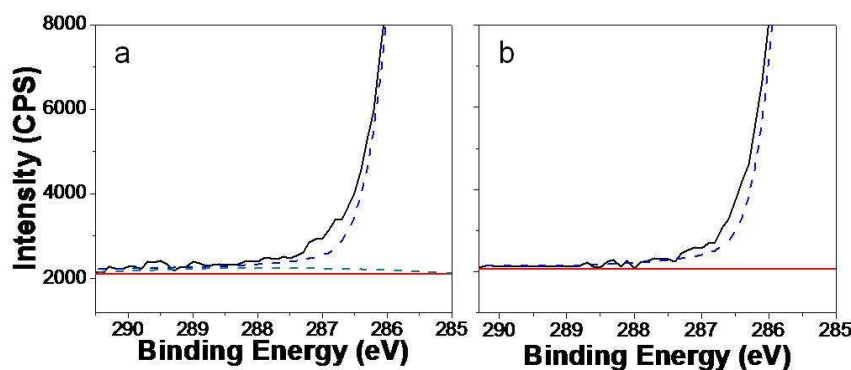

Figure S1. C (1s) XPS spectra of (a) UV-modified and (b) unmodified PDMS surface.

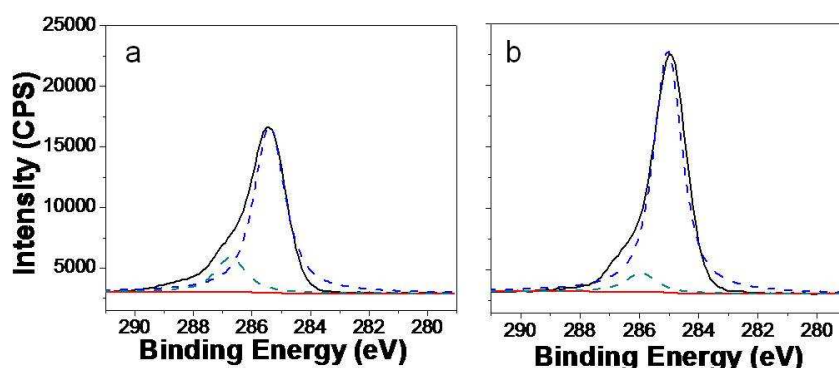

Figure S2. C (1s) XPS spectra of (a) UV-modified and (b) unmodified DMOAP surface
